# Supplementary material for: An underestimated record breaking event – why summer 1540 was likely warmer than 2003
Source: Copernicus journal article supplement (doi:10.5194/cp-9-41-2013), 2013-01-14

| <b>Sources</b> | <b>Originator</b>                | <b>Title</b>                                                                                                                                                                                                                                                 |
|----------------|----------------------------------|--------------------------------------------------------------------------------------------------------------------------------------------------------------------------------------------------------------------------------------------------------------|
| Sc1            | Bullinger, Heinrich (1504-1575)  | Bullinger; Heinrich; Diarium (annales vitae) der Jahre 1504-1574; (Egli; E., ed.); Quellen zur Schweizer Reformationsgeschichte, 2, Basel, 1904.                                                                                                             |
| Sc2            | Im-Thurn, Eduard (1579-1648)     | Chronik der Stadt Schaffhausen. Drittes Buch. Von Wiedererlangung der Reichsfreiheit bis zum Eintritt in den Bund der Eidgenossen 1415-1501. In: Historische Gesellschaft zu Basel, Band 223, Basel, 1844.                                                   |
| Sc3            | Huber, Hans Oswald (1521-1582)   | Schaffhauser Chronik, in: Festschrift zur Erinnerung an das 50jährige Jubiläum des historisch-antiquarischen Vereins des Kantons Schaffhausen, (Bächtold, C.A ed.), Meier & Cie, 196pp., Schaffhausen, 1906.                                                 |
| Sc4            | Dürr, F.                         | Chronik der Stadt Heilbronn. 741-1895. Unveränderter Nachdruck der 2. Auflage von 1926.                                                                                                                                                                      |
| Sc5            | Fischer, Sebastian               | Sebastian Fischers Chronik besonders von Ulmischen Sachen, in: Verein für Kunst & Alterthum für Ulm und Oberschwaben, (Veesenmeyer, K. G. ed.), Ulm, 1896.                                                                                                   |
| Sc6            | Teyssleuh Pierre de              | Alfred LEROUX (editor). Extraits du Journal de Me Pierre de Teyssleuh, chanoine de l'église de Limoges, 1533-1568, dans Chartes, chroniques et mémoriaux pour servir à l'histoire du Limousin, Tulle : Crauffon / Limoges : Ducourtieux, 1886.               |
| Sc7            | Cysat, Renward (1545-1614)       | Collectanea pro Chronica Lucernensi et Helvetiae, Bd. 1, 1. und 3. Teil, ed. by Josef Schmid, Luzern, 1972                                                                                                                                                   |
| Sc8            | Rechberger, Benedikt             | Bähler, A.: Bendicht Rechbergers Bielerchronik 1524-1566, Werner Ruck-Beck, 41 pp., Biel, 1902                                                                                                                                                               |
| Sc9            | Delsalle, Paul                   | La Franche-Comté au temps de Charles Quint, Université de Franche-Comté : Presses Universitaires de Franche-Comté, 2001, Archives Municipales de Besançon, B.B. 21, f 111 v.                                                                                 |
| Sc10           | Haffner, Franciscus              | Der klein Solothurner allgemeine Schaw-Platz Historischer Geist- auch Weltlicher vornembster Geschichten und Händlen, Solothurn, 1666.                                                                                                                       |
| Sc11           | Walser, Gabriel                  | Neue Appenzeller Chronik oder Geschichte des Landes Appenzell der Innern und Äussern Rhoden; St.Gallen, Trogen; 1829                                                                                                                                         |
| Sc12           | Froissard, Anatoile              | Livre de raison de la famille de Froissard-Broissia de 1532 à 1701, in: Mémoires de la Société d'émulation du Jura, 27–105, 1886.                                                                                                                            |
| Sc13           | Engel (1598)                     | Annales Marchiae Brandenburgicae.- Frankfurt/Oder.                                                                                                                                                                                                           |
| Sc14           | Gasser, A. P. (1576)             | Chronik von A.P. Gasser, 2° Cod. Aug. 40. Stadtbibliothek Augsburg.                                                                                                                                                                                          |
| Sc15           | Tschamser, Malachias (1678-1742) | Annales oder Jahrs-Geschichten der Baarfüsener oder Minderen-Brüdern S. Franc. ord. insgemein Conventualen genannt, zu Thann, Chronique de Thann, 2 ade. Colmar, 1864.                                                                                       |
| Sc16           | Salat, Hans (~1510-1540)         | Tagebuch – Hans Salat ein Schweizerischer Chronist und Dichter aus der ersten Hälfte des XVI: Jahrhunderts. Sein Leben und seine Schriften, ed. by. Baechtold, Jacob, Basel, 1876.                                                                           |
| Sc17           | Goldschmied, Jenann Jakob        | Goldschmid, Jenann Jakob, 1715-1769, Erzellung seltsammer Natur-Geschichten; Ungewohnten Jahrgeangen: theuren und wohlfeilen Zeiten, Sterbensleuffen und anderen dergleichen so sich bey uns in der Statt Winterthur zugetragen haben (bis 1543). Ms Fol. 3. |
| Sc18           | Ryff, Fridolin (1488-1554)       | Chronik des Fridolin Ryff 1514 - 1541, mit der Fortsetzung des Peter Ryff 1543 – 1585. In: Basler Chroniken 1. Band 1872.                                                                                                                                    |

| Sources | Originator                                   | Title                                                                                                                                                                                                                                                  |
|---------|----------------------------------------------|--------------------------------------------------------------------------------------------------------------------------------------------------------------------------------------------------------------------------------------------------------|
| S1      | Bullinger,<br>Heinrich<br><br>(1504-1575)    | Bullinger, Heinrich; Diarium (annales vitae) der Jahre 1504-1574; (Egli, E., ed.); Quellen zur Schweizer Reformationsgeschichte, 2, Basel, 1904.                                                                                                       |
| S2      | Haffner,<br>Franciscus<br><br>(1609-1671)    | Der klein Solothumer allgemeine Schaw-Platz Historischer Geist- auch Weltlicher vornembster Geschichten und Händlen, Solothum, 1666.                                                                                                                   |
| S3      | Walser, Gabriel<br><br>(1695-1776)           | Neue Appenzeller Chronik oder Geschichte des Landes Appenzell der Innern und Äussern Rhoden; St.Gallen, Trogen; 1829                                                                                                                                   |
| S4      | Im-Thurn,<br>Eduard<br><br>(1579-1648)       | Chronik der Stadt Schaffhausen. Drittes Buch. Von Wiedererlangung der Reichsfreiheit bis zum Eintritt in den Bund der Eidgenossen 1415-1501. In: Historische Gesellschaft zu Basel, Band 223, Basel, 1844.                                             |
| S5      | Huber,<br>Hans Oswald<br><br>(1521-1582)     | Schaffhauser Chronik, in: Festschrift zur Erinnerung an das 50jährige Jubiläum des historisch-antiquarischen Vereins des Kantons Schaffhausen, (Bächtold, C.A ed.), Meier & Cie, 196pp., Schaffhausen, 1906.                                           |
| S6      | De Teysseulh,<br>Pierre<br><br>(1535-1568)   | Alfred LEROUX (éditeur), Extraits du Journal de Me Pierre de Teysseulh, chanoine de l'église de Limoges, 1533-1568, in: Chartes, chroniques et mémoriaux pour servir à l'histoire du Limousin, Ducourtieux, 259 pp., Tulle, Crauffon, Limoges, 1886.   |
| S7      | Gaufreteau,<br>Jacques de                    | Chronique Bourdeloise, (Delpit J. ed.), Bordeaux, 1877-1878.                                                                                                                                                                                           |
| S8      | Vanotti                                      | Nachrichten über Witterung, Fruchtbarkeit und Preise der Naturalien vom Jahr 1138 bis 1650, in: Württembergische Jahrbücher für vaterländische Geschichte, Geographie Statistik und Topographie J.G.D. (Memminger, J.G.D.ed.), 1. Heft, 131-170, 1829. |
| S9      | Kessler, Josua<br><br>(1527-1580)            | Kessler, Josua, 1527-1580, Chronologie Santgallischer Begebenheiten vom Jahr 1540 bis Ende des Jahres 1645 aufgezeichnet durch J.K., Stadtschreiber in St. Gallen, 1711.                                                                               |
| S10     |                                              | Lindauer Chronik bis 1754, Stadtarchiv Lindau, 664 pp.                                                                                                                                                                                                 |
| S11     | Fischer,<br>Sebastian                        | Sebastian Fischers Chronik besonders von Ulmischen Sachen, in: Verein für Kunst & Alterthum für Ulm und Oberschwaben, (Veesenmeyer, K. G. ed.), Ulm, 1896.                                                                                             |
| S12     | Froissard,<br>Anatoile                       | Livre de raison de la famille de Froissard-Broissia de 1532 à 1701, in: Mémoires de la Société d'émulation du Jura, 27-105, 1886.                                                                                                                      |
| S13     |                                              | Chronik der Stadt Schweinfurt.- Schweinfurt: UB Würzburg, Rp XXIII, 490a, 624 pp.                                                                                                                                                                      |
| S14     |                                              | Grandi, A.: Descrizione dello stato fisico-politico-statistico-storico-biografico della Provincia e Diocesi di Cremona, Cremona, L. Copelotti, 1856.                                                                                                   |
| S15     | Stolz,<br>Hans<br><br>(~1510~1540)           | Die hans Stolz'sche gebweiler chronik. Zeugenbericht über den Bauernkrieg am Oberrhein, (Stolz, W.), Freiburg, 1979.                                                                                                                                   |
| S16     | De' Bianchi,<br>Tomasino<br><br>(1473 -1554) | Cronaca Modenese di Tomasino De' Bianchi detto De' Lancellotti, 1538-1540, in: Monumenti di Storia Patria delle province modenesi, Serie delle Cronache, tomo VII, Parma (Borghi, C. ed.), Fiaccadori, 514 pp., 1868.                                  |

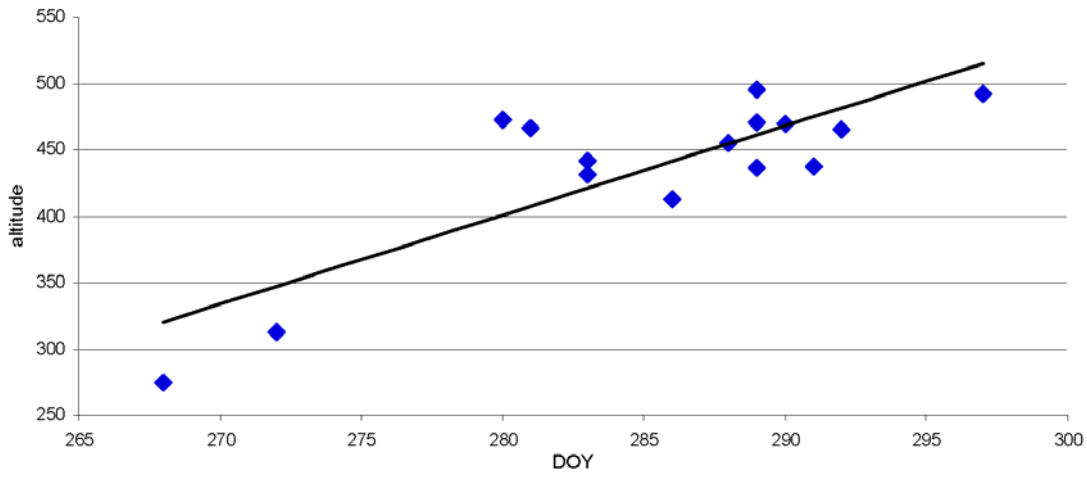

◆ long term mean of GHD R2 correlation Alt-DOY = 0.68

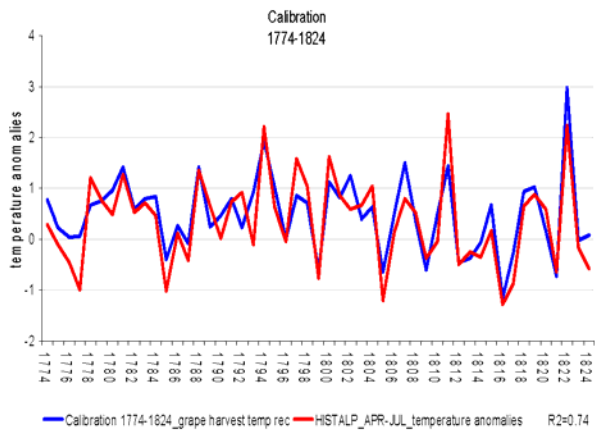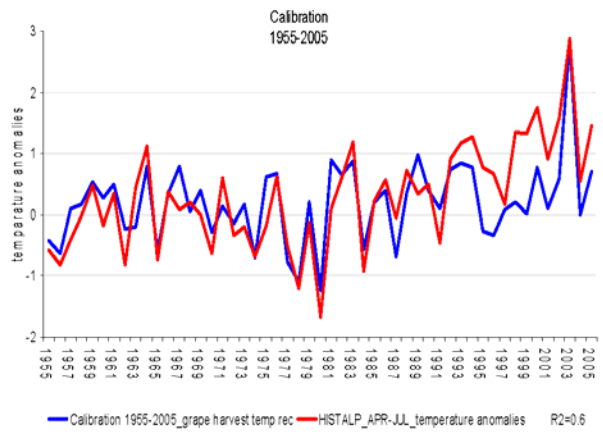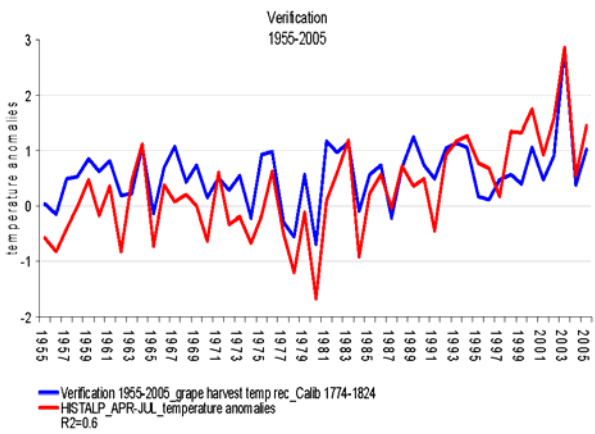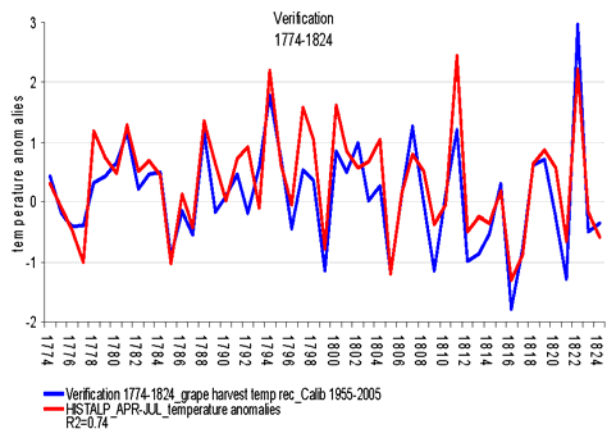

Supplement: Supplementary file [file cp-9-41-2013-supplement.pdf]
